1  
2  
3 **Reduced PTPRD expression differentially alters brain phosphotyrosine phosphoproteomic**  
4 **profiles of 2 and 12 month-old mice**  
5  
6  
7

8 Short title: **PTPRD and brain phosphoproteomics**  
9

10  
11 George R Uhl MD PhD<sup>1, 2, 3\*</sup>, Ian M Henderson PhD<sup>1,2</sup>, Maria Martinez PhD<sup>1,2</sup>, Matthew P Stokes  
12 PhD<sup>4</sup>  
13

14 1 Biomedical Research Institute of New Mexico, Albuquerque New Mexico 87108 USA

15 2 New Mexico VA Healthcare System, Albuquerque New Mexico 87108 USA

16 3 Departments of Neurology, Neuroscience and Molecular Genetics and Microbiology, University of  
17 New Mexico, Albuquerque New Mexico 87106 USA

18 4 Cell Signaling Technology, Inc, Danvers, Massachusetts 01923 USA  
19  
20  
21  
22  
23  
24  
25  
26  
27  
28

29 \* Correspondence to George Uhl MD PhD FANA FACNP Email: [George.Uhl@va.gov](mailto:George.Uhl@va.gov)  
30  
31  
32  
33

## 34 **Abstract**

35 The receptor type protein tyrosine phosphatase PTPRD is implicated in maturation of synapses of  
36 expressing neurons, vulnerability to addictions, reward from addictive substances, vulnerability to  
37 restless leg syndrome and densities of neurofibrillary pathology in Alzheimer's disease brains by a  
38 variety of evidence. However, PTPRD's physiological substrates and adaptations to differences in  
39 levels of PTPRD expression in brains of young and aging animals have not been explored in depth.  
40 We report phosphoproteomic studies of brains of young and aged mice with different levels of PTPRD  
41 expression, gene ontology studies of genes identified in this way and validation of several candidate  
42 PTPRD substrates with *in vitro* assays using recombinant PTPRD phosphatase. PTPRD is well  
43 positioned to modulate the extent of phosphorylation of phosphotyrosine phosphoprotein substrates,  
44 including those involved in synaptic maturation and adaptation.

## 46 **Introduction**

47 The receptor type protein tyrosine phosphatase PTPRD is one of the most highly-expressed neuronal  
48 protein tyrosine phosphatases (1, 2). PTPRD binds to extracellular ligands including interleukin 1  
49 receptor like and accessory (IL1RL1 and IL1RAPL1), Slittrk, SALM and/or NGL proteins in ways that  
50 (likely) alter activities of its intracellular protein tyrosine phosphatase and thus contribute to the  
51 maturation of synapses of PTPRD-expressing neurons (1, 3).

52 Common variation in the human PTPRD gene intron 9 - 11 region exerts sizable "oligogenic"  
53 influences on densities of neurofibrillary pathology in Alzheimer's disease brains, vulnerability to  
54 restless leg syndrome (RLS) and levels of PTPRD mRNA in human postmortem cerebral cortex (4-6).  
55 There are more modest, polygenic influences of common variation in this gene on vulnerability to  
56 development of a substance use disorder, abilities to quit smoking, ability to stop use of opiates and  
57 reward from psychostimulants (1, 7, 8). A rare human PTPRD knockout provides substantial  
58 intellectual disability (9).

59 Mice with constitutively-reduced PTPRD expression display reduced reward from stimulants,  
60 supporting polygenic associations with addiction phenotypes (5, 10). They display disrupted sleep  
61 onset, supporting associations with RLS (5, 10). Homozygous knockouts, but not heterozygotes,  
62 display substantial mnemonic deficits (5, 11) in ways that fit with observations in humans. Our initial  
63 observations support increased activating tyrosine phosphorylation of the tau kinases GSK3 $\beta$  and  
64 GSK3 $\alpha$  and greater age-related accumulation of pS202/pT205/pS208 phosphotau immunoreactivity  
65 in brains of mice with reduced PTPRD expression (12). Attention to roles of altered PTPRD in aging  
66 could thus add insight into potential biochemical bases for reported oligogenic associations between  
67 PTPRD variants and the age-related neurofibrillary pathology found in Alzheimer's disease brains (4).  
68 Phosphotyrosine phosphoproteomic studies can identify greater or less abundance of  
69 phosphotyrosine phosphoproteins in brains of mice with reduced PTPRD expression. Simplistically,  
70 phosphotyrosine phosphoproteins that display increased expression in knockouts and co-expression  
71 with PTPRD are candidate PTPRD substrates. Proteins displaying decreased tyrosine  
72 phosphorylation in PTPRD knockouts or those that are display increased phosphorylation but are not  
73 co-expressed are candidates to provide adaptations to reduced PTPRD expression. Each of these  
74 categories is of interest for interpreting the combined human and mouse data relevant to addiction  
75 and RLS noted above. When we compare these patterns in young vs aged mice with constitutively-  
76 altered PTPRD expression, we can assess age-related changes in both candidate PTPRD substrates  
77 and in adaptations to altered PTPRD expression. These aging findings could contribute to  
78 understanding PTPRD's associations with Alzheimer's disease neurofibrillary pathology.  
79 We now report assessment of the abundance of tyrosine phosphorylated brain proteins in brains of 2  
80 and 12 month old wildtype mice and littermates with reduced PTPRD expression. We compare  
81 assessments from a complete dataset to those from prior and concurrent work with relevant *c.*  
82 *elegans* and mouse phosphotyrosine phosphoproteomics (13, 14) and with data from a second  
83 independent partial dataset from our laboratory. We confirm that several of the candidate PTPRD

84 phosphotyrosine substrates identified by this work are avidly dephosphorylated by recombinant  
85 PTPRD phosphatase *in vivo*. We discuss the implications and limitations of these data for  
86 understanding PTPRD's physiological activities and adaptations to its modulation.

## 88 **Materials and Methods**

89 *Mice and brains:* Mice with reduced PTPRD expression and wildtype littermates were bred from  
90 heterozygote x heterozygote crosses as described from mice initially generously supplied by Uetani  
91 and colleagues (5, 10, 11). Mice were housed in the NMVAHCS animal facility, fed moistened food on  
92 cage floors until weaning and genotyped as described (10). One mouse required sacrifice due to  
93 dental issues at about 6 mos of age. Mice were sacrificed by rapid cervical dislocation at about 2 or  
94 12 months of age, brains rapidly removed and split by a midsagittal razor blade cut. Our main dataset  
95 comes from analyses of proteins from half brains (n = 4/genotype/age group except n = 3 for 12-  
96 month old WT) that were rapidly frozen on aluminum foil placed on dry ice blocks and then rapidly  
97 covered by dry ice powder and maintained at -80°C until analyses. A second “partial” dataset was  
98 obtained from brains placed into polypropylene tubes that were then floated onto liquid nitrogen in  
99 ways that provided differences in time to freezing. All procedures were approved by the NMVAHCS  
100 Animal care and use committee.

101 *Phosphotyrosine phosphoproteomic analyses:* We used mass spectrographic analyses and  
102 quantitation of immunoprecipitated tryptic phosphotyrosine phosphopeptides extracted from frozen  
103 mouse half brains as described (15). Briefly, frozen half brains were sonicated in urea lysis buffer,  
104 sonicated, centrifuged, reduced with DTT, and alkylated with iodoacetamide. 15 mg protein from each  
105 sample was digested with trypsin and purified over C18 columns for enrichment using  
106 phosphotyrosine pY-1000 motif antibodies #8803 (Cell Signaling, Danvers, Mass). Enriched peptides  
107 were purified over C18 STAGE tips (16) and subjected to LC-MS/MS analyses. Replicate injections of  
108 each sample were run non-sequentially. Phosphopeptides were eluted using 90-minute linear

109 gradients of acetonitrile in 0.125% formic acid delivered at 280 nL/min. Tandem mass spectra were  
110 collected in a data-dependent manner using a Thermo Orbitrap Fusion™ Lumos™ Tribrid™ mass  
111 spectrometer, a top-twenty MS/MS method, a dynamic repeat count of one and a repeat duration of  
112 30 sec. Real time recalibration of mass error was performed using lock mass (17) with a singly  
113 charged polysiloxane ion  $m/z = 371.101237$ .

114 MS/MS spectra were evaluated using Comet and the Core platform (17-19). Files were searched  
115 against the SwissProt *Mus musculus* FASTA database. A mass accuracy of +/-5 ppm was used for  
116 precursor ions and 0.02 daltons for product ions. At least one tryptic (K- or R-containing) terminus  
117 was required per peptide and up to four mis-cleavages allowed. Cysteine carboxamidomethylation  
118 was specified as a static modification. Methionine oxidation and phosphorylation on serine, threonine  
119 and/ or tyrosine residues were allowed as variable modifications. Reverse decoy databases were  
120 included for all searches to estimate false discovery rates (FDR) and filtered using Core's linear  
121 discriminant module with a 1.0% FDR. Peptides were filtered for the presence of a tyrosine  
122 phosphorylated residue (strict motif) or serine/threonine phosphorylated residue within 2 amino acids  
123 of a tyrosine (lax motif). Quantitative results were generated using Skyline (20) to extract the  
124 integrated peak areas of the corresponding peptide assignments. Accuracy of quantitative data was  
125 ensured by manual review in Skyline and/or in the ion chromatogram files.

126 *Phosphatase/dephosphorylation assays:* Recombinant PTPRD phosphatase protein (> 95% purity)  
127 was produced in *E Coli* from His-tagged constructs as described (21)(22). We synthesized human  
128 actin $\beta$ \_1 KCDVDIRKDL[pY]ANTVLSGGTT, actin $\beta$ \_2 IVRDIKEKLC[pY]VALDFEQEMA, actin $\beta$ \_3  
129 GDGVTHTVPI[pY]EGYALPHAIL, cofilin 1 GDVGQTVDDP[pY]ATFVKMLPDK and dock4  
130 LGLDLVPRKE[pY]AMVDPEDISI phosphopeptides and compared these data to a positive control  
131 END[pY]INASL (Promega) phosphopeptide studied in the same experiments.

132 Orthophosphate release assays (Promega V2471) used Malachite green and molybdate with  
133 spectrophotometric detection of liberated free orthophosphate from test phosphopeptides compared

134 to control/comparison phosphopeptides with assessments for the times indicated. Reactions were  
135 carried out in half-area 96-well plates with three wells dedicated for each time point. To each  
136 experimental well, we added a mixture of 18  $\mu\text{L}$  of ultrapure water, 25  $\mu\text{L}$  of running buffer (43.4  $\mu\text{M}$   
137 HEPES (pH 7.4), 2.2 mM dithiothreitol, 0.44% acetylated bovine serum albumin, 22.2 mM NaCl, 4.4  
138 mM EDTA) and 1  $\mu\text{L}$  of a 10mM DMSO solution of the desired peptide. 50  $\mu\text{L}$  of molybdate dye  
139 mixture was added at  $t = 0$ , followed by 5  $\mu\text{L}$  of a 1:100 dilution of enzyme in dilution buffer (22.9 mM  
140 pH 7.4 HEPES, 1% acetylated bovine serum albumin, 4.6 mM dithiothreitol). In control experiments,  
141 we added enzyme that was heated to 100C for 20 min, cooled and added to reactions similarly. Other  
142 wells were initiated *via* the addition of 5  $\mu\text{L}$  of the diluted enzyme mixture @  $t=0$  and terminated at the  
143 desired timepoints by addition of 50  $\mu\text{L}$  of the dye solution. Wells were read @ 605 nm using a  
144 Spectromax spectrophotometer (Molecular Devices, San Jose CA).

145 *Data analyses:* We used data from the phosphopeptides whose abundance was most different and  
146 statistically-significant (nominal) to identify genes presented tables in the body of the paper, for gene-  
147 based analyses of overlap with other datasets (using hypergeometric tests) and for tests of  
148 overrepresentation among Gene ontology terms. We used 1.5 or 2 fold cutoffs for genes in tables and  
149  $p < 10^{-8}$  or  $< 10^{-7}$  for gene ontology terms following manual inspection of the datasets. Ambiguities in  
150 phosphopeptide assignment to genes are maintained in these tables.

151 Corresponding phosphopeptide-level datasets are included in the Supplement. Coexpression data  
152 come from Allen brain institute mouse cortex/hippocampus single cell RNA seq datasets.

## 154 **Results**

155 *Phosphopeptides identified:* We identified 1835 discrete phosphopeptides corresponding to 813  
156 genes or groups of genes that were immunoprecipitated using phosphotyrosine antibodies and  
157 identified by these approaches.

158 *Phosphotyrosine phosphopeptides whose abundance increased with reduced PTPRD expression in*  
 159 *the main dataset from young mice:* We identified 101 phosphopeptides from 76 proteins (or groups of  
 160 related proteins sharing the same sequence) that displayed  $\geq 1.5$ -fold increased abundance and  
 161 nominal  $p < 0.05$  in 2 month old PTPRD knockout vs wildtype mice from our main dataset (Table I;  
 162 Supplement Table 1).

163 Table I: Genes encoding phosphopeptides with increased abundance in 2 mo old PTPRD knockout mice

| <b>Fold change<br/>young KO :<br/>WT</b> | <b>p young<br/>KO : WT</b> | <b>Gene Name(s)</b>                        |
|------------------------------------------|----------------------------|--------------------------------------------|
| 7.9                                      | 0.00218                    | Actb;Actg1;Actbl2***                       |
| 5.9                                      | 0.04940                    | Nyap2**                                    |
| 5.0                                      | 0.02009                    | Psmb6*                                     |
| 4.2                                      | 0.00006                    | Srsf1**                                    |
| 4.0                                      | 0.00140                    | Cfl1;Cfl2**                                |
| 4.0                                      | 0.02958                    | Mpzl1                                      |
| 3.8                                      | 0.00001                    | Ckb***                                     |
| 3.7                                      | 0.00003                    | Grin2b***                                  |
| 3.6                                      | 0.00336                    | Cyfp2**                                    |
| 3.5                                      | 0.04939                    | Fkbp5*                                     |
| 3.4                                      | 0.03835                    | Irs2*                                      |
| 3.4                                      | 0.00130                    | Caskin2**                                  |
| 3.4                                      | 0.02578                    | Ank2***                                    |
| 3.3                                      | 0.00005                    | Dock4**                                    |
| 3.2                                      | 0.00218                    | Fgfr1*                                     |
| 3.1                                      | 0.00117                    | Crkl*                                      |
| 3.0                                      | 0.00670                    | Usp14*                                     |
| 3.0                                      | 0.01850                    | Psm11**                                    |
| 3.0                                      | 0.00009                    | Hgs                                        |
| 3.0                                      | 0.00292                    | Mapk8;Mapk9;Mapk10***                      |
| 2.9                                      | 0.03977                    | Pura***                                    |
| 2.9                                      | 0.00180                    | Epha5***                                   |
| 2.8                                      | 0.04198                    | Gnao1***                                   |
| 2.8                                      | 0.04294                    | Cilk1                                      |
| 2.8                                      | 0.00435                    | Srcin1**                                   |
| 2.7                                      | 0.02921                    | App***                                     |
| 2.7                                      | 0.01346                    | Mrpl58*                                    |
| 2.7                                      | 0.01275                    | Rpn1*                                      |
| 2.7                                      | 0.00071                    | Pcdhga4;Pcdha4                             |
| 2.7                                      | 0.01675                    | Tuba1a;Tuba1b;Tuba1c;Tuba3a;Tuba4a;Tuba8** |

|     |         |                 |
|-----|---------|-----------------|
| 2.7 | 0.00259 | Gprc5b*         |
| 2.7 | 0.00446 | Syngap1         |
| 2.6 | 0.01242 | Gdi1;Gdi2**     |
| 2.6 | 0.00658 | Cadm1***        |
| 2.6 | 0.00001 | Fbp1            |
| 2.6 | 0.00152 | Rpl31*          |
| 2.6 | 0.02494 | Syt1***         |
| 2.6 | 0.00345 | Ap2b1**         |
| 2.5 | 0.03793 | Atp6v1h**       |
| 2.5 | 0.01381 | Npepps**        |
| 2.5 | 0.04000 | Pacs1*          |
| 2.4 | 0.00050 | Anxa2           |
| 2.4 | 0.02382 | Cadm2***        |
| 2.4 | 0.02550 | Rpl6***         |
| 2.4 | 0.00041 | Got1**          |
| 2.4 | 0.01478 | Afap1l2         |
| 2.4 | 0.00451 | Kcnab2*         |
| 2.4 | 0.03207 | Idh1            |
| 2.4 | 0.00000 | Prkacb***       |
| 2.4 | 0.01592 | Camkv**         |
| 2.3 | 0.00468 | Ptprj**         |
| 2.3 | 0.00014 | Ofd1            |
| 2.3 | 0.01615 | Gdi1*           |
| 2.3 | 0.00189 | Kiaa0513na      |
| 2.3 | 0.00170 | Nck2*           |
| 2.3 | 0.00368 | Madd**          |
| 2.3 | 0.00196 | Plcb1***        |
| 2.2 | 0.03739 | Mapk8;Mapk10*** |
| 2.2 | 0.00033 | Vcl*            |
| 2.2 | 0.00287 | Atp1a1**        |
| 2.2 | 0.00547 | Pdha1**         |
| 2.1 | 0.00104 | Caskin1*        |
| 2.1 | 0.00414 | Vta1            |
| 2.1 | 0.00105 | Synj1**         |
| 2.1 | 0.04279 | Hk1**           |
| 2.1 | 0.03279 | Rpl8***         |
| 2.0 | 0.00106 | Pafah1b1***     |
| 2.0 | 0.00303 | Ywhah***        |
| 2.0 | 0.01709 | Mydgf*          |
| 2.0 | 0.00063 | Khynyn          |
| 2.0 | 0.00000 | Mapk14*         |
| 2.0 | 0.00370 | Uba1*           |
| 2.0 | 0.00005 | Ntrk2***        |
| 2.0 | 0.01335 | Hsp90ab1***     |



|     |         |         |
|-----|---------|---------|
| 2.0 | 0.00639 | Gpm6b** |
| 1.9 | 0.01621 | Crk**   |

164

165 Table 1: Genes containing phosphotyrosine phosphopeptides whose abundance is increased > 1.5  
166 fold (fold increase column 1) with  $p < 0.05$  (nominal  $p$  value column 2) in proteins extracted from  
167 brains of 2 month old PTPRD knockout mice compared to wildtype littermates.  $n = 4/\text{genotype}$ . Some  
168 phosphopeptides could come from several genes, as listed. Asterix number: relative extent of  
169 coexpression of the gene in the cell types that express PTPRD in mouse cerebral cortex +  
170 hippocampus RNAseq data (Allen brain institute). \*\*\* substantial coexpression; \*\* moderate  
171 coexpression; \*coexpression in several cell types.

172 Gene ontology (GO) annotation of this list of genes documents overrepresentation of interesting GO  
173 terms with FDR-corrected  $p < 10^{-4}$ , including: cell junction, synapse, cytoplasm, cell projection,  
174 postsynaptic density, asymmetric synapse, neuron projection, postsynaptic specialization, neuron to  
175 neuron synapse and glutamatergic synapse. (Supplement Table 2). Most of these genes are  
176 coexpressed with PTPRD in mouse cortical and hippocampal neuronal types defined by Allen Brain  
177 Institute single cell RNAseq datasets (Table 1). Only Caskin 2, Pcd4, Tub1a, Tub1c, Tub 3a, FBP1,  
178 Idh 1 and vta 1 fail to display substantial coexpression in at least one of the PTPRD-expressing  
179 neuronal types described in this data.

180 The group of coexpressed genes is thus likely to contain many PTPRD substrates, though some  
181 could also contain phosphotyrosines whose differential abundance could provide indirect adaptations  
182 to reduced PTPRD expression.

183 *Phosphotyrosine phosphopeptides whose abundance decreases with reduced PTPRD expression in*  
184 *the main dataset from young mice:* We identified 101 phosphopeptides from 40 proteins (or groups of  
185 related proteins sharing the same sequence) that displayed  $\geq 1.5$ -fold decreased abundance and  
186 nominal  $p < 0.05$  in 2 month old PTPRD knockout vs wildtype mice (Table II, Supplement Table 3).

187 Table II: Genes encoding phosphopeptides with decreased abundance in 2 mo old PTPRD knockout  
188 mice

| Young KO : WT | Young KO : WT | Gene Name    |
|---------------|---------------|--------------|
| -19.5         | 0.00001       | Il1rapl1***  |
| -9.5          | 0.04435       | Shank2**     |
| -9.0          | 0.01587       | Slitrk5*     |
| -6.2          | 0.00472       | Gria3**      |
| -4.1          | 0.00142       | Grin2a***    |
| -4.1          | 0.00356       | Syngap1*     |
| -4.1          | 0.00032       | Lrrc7***     |
| -3.7          | 0.02165       | Grin2b***    |
| -3.6          | 0.00015       | Ildr2**      |
| -3.5          | 0.00721       | Gja1         |
| -3.4          | 0.04394       | Ctnnd2***    |
| -3.4          | 0.00256       | Arhgef33     |
| -3.2          | 0.04114       | Dlg2***      |
| -3.1          | 0.00511       | Septin5      |
| -3.1          | 0.02536       | Caskin1*     |
| -3.0          | 0.03716       | Ptk2**       |
| -2.9          | 0.00094       | Ajm1         |
| -2.8          | 0.01108       | Elfn2*       |
| -2.8          | 0.02941       | Pkp4*        |
| -2.7          | 0.04453       | Pclo***      |
| -2.6          | 0.00219       | Kcnab2*      |
| -2.5          | 0.03234       | Baiap2**     |
| -2.5          | 0.01833       | Dlgap1***    |
| -2.5          | 0.04695       | Septin4*     |
| -2.5          | 0.03359       | Grin2c       |
| -2.3          | 0.04501       | Dlgap4**     |
| -2.3          | 0.03262       | Tgfb1i1      |
| -2.2          | 0.01523       | Hcn2*        |
| -2.2          | 0.00868       | Igf1r;Insr** |
| -2.2          | 0.02114       | Rapgef4***   |
| -2.1          | 0.00525       | Cacng2**     |
| -2.1          | 0.00559       | Pag1*        |
| -2.1          | 0.02832       | Ablim1**     |
| -2.1          | 0.02474       | Adgrb1*      |
| -2.1          | 0.02322       | Begain*      |
| -2.1          | 0.03372       | Akr1b1       |
| -2.0          | 0.01554       | Glud1*       |
| -2.0          | 0.00651       | Gab1         |
| -2.0          | 0.01905       | Nefh*        |

-2.0                      0.01419                      Psm2\*\*

189 Table 2: Genes containing phosphotyrosine phosphopeptides whose abundance is decreased > 1.5  
190 fold (fold decrease column 1) with  $p < 0.05$  (nominal  $p$  value column 2) in proteins extracted from  
191 brains of 2 month old PTPRD knockout mice compared to wildtype littermates.  $n = 3 - 4$ /genotype.  
192 Some phosphopeptides could come from several genes, as listed. Asterix number: relative extent of  
193 coexpression of the gene in the cell types that express PTPRD in mouse cerebral cortex +  
194 hippocampus RNAseq data (Allen brain institute). \*\*\* substantial coexpression; \*\* moderate  
195 coexpression; \*coexpression in several cell types

196 Gene ontology terms that are identified by this group of genes with FDR corrected  $p < 10^{-4}$  include:  
197 cell junction, postsynapse, postsynaptic specialization, synapse, postsynaptic density, asymmetric  
198 synapse, glutamatergic synapse, somatodendritic compartment, dendrite, neuron projection,  
199 ionotropic glutamate receptor complex, neurotransmitter receptor complex, plasma membrane region,  
200 ion channel complex and postsynaptic membrane (Supplementary Table 4).

201 These terms align with the idea that many of the adaptations to reduced PTPRD expression can be  
202 found in neuronal specializations that can be postsynaptic to often-presynaptically-expressed PTPRD  
203 (14). In particular, some of the most striking changes are found in candidate PTPRD ligands. The  
204 largest reduction in phosphorylation is in phosphopeptides in the PTPRD ligand Il1rapl1 (23). The  
205 third largest is in Slitrk5, another candidate PTPRD ligand (24). Each of these features is consistent  
206 with the idea that many of the reductions in protein tyrosine phosphorylation in PTPRD knockout mice  
207 could represent adaptations to PTPRD loss.

208 *Supporting studies of PTPRD phosphatase activities:* We synthesized several actin as well as cofilin  
209 and dock4 phosphopeptides as candidate substrates for PTPRD's phosphatase since these were: a)  
210 among those whose abundance increased most strikingly in two month old mice with reduced PTPRD  
211 expression; b) products of genes that are coexpressed abundantly with PTPRD in cerebral cortical

212 neuronal cell types and c) products of genes that are good candidates for involvement in neuronal  
213 adaptations plausibly associated with PTPRD functions as a synaptic organizer (3, 25-28).  
214 PTPRD phosphatase cleaved orthophosphate from each of these phosphopeptides and from our  
215 END(pY)INASL at rates much greater than those (essentially zero) for control experiments using  
216 boiled/inactive phosphatase. Rates for orthophosphate release ranged from almost twice those for  
217 the positive control END(pY)INASL for Dock4 and actin $\beta$ \_3 phosphopeptides to about 20% of the  
218 positive control for the cofilin 1 phosphopeptide (Table 3). Each of these rates were significantly  
219 Table III: Relative rates of orthophosphate release by recombinant PTPRD phosphatase from  
220 phosphopeptides whose abundance increased in mice with reduced PTPRD expression

|                  | Ratio to pyEND |      |
|------------------|----------------|------|
|                  | Ratio          | SEM  |
| Actin $\beta$ _1 | 0.38           | 0.08 |
| Actin $\beta$ _2 | 0.71           | 0.07 |
| Actin $\beta$ _3 | 1.45           | 0.14 |
| Cofilin 1        | 0.17           | 0.02 |
| Dock4            | 1.88           | 0.14 |

221 Table 3: Relative rates of orthophosphate release from synthetic phosphopeptides corresponding to  
222 candidate PTPRD substrates actin (three regions), cofilin and dock 4. Rates of orthophosphate  
223 release from phosphopeptides shown were compared to rates of release from positive control  
224 END(pY)INASL in the same experiment. Values are mean +/- SEM from three replicate experiments,  
225 each using triplicate assays and data from four time points.  
226 different from rates for experiments using boiled control phosphopeptide. These results support our  
227 phosphopeptide phosphoproteomic studies, since each of the tested candidate substrates is actively  
228 hydrolyzed by recombinant PTPRD phosphatase *in vitro*.

229 *Phosphotyrosine phosphopeptides with smaller KO:WT differences in older vs younger mice: We*  
 230 identified 31 phosphopeptides from 24 genes that displayed > 1.5-fold smaller differences in  
 231 abundance with  $p < 0.05$  nominal significance in comparisons of old knockout to old wildtype vs  
 232 young knockout to young wildtype mice (Table 4, Supplementary Table 5).

233 Table IV: Genes encoding phosphopeptides with smaller KO:WT differences in 12 vs 2 mo old  
 234 PTPRD knockout mice

| Difference<br>Old-Young | Fold change                |                  |               |                    | Gene Name |
|-------------------------|----------------------------|------------------|---------------|--------------------|-----------|
|                         | Fold change Old<br>KO : WT | Young KO :<br>WT | p Old KO : WT | p Young KO<br>: WT |           |
| -14.0                   | -15.7                      | -1.7             | 0.0174        | 0.03               | Grin2b    |
| -7.3                    | -11.4                      | -4.1             | 0.0346        | 0.00               | Lrrc7     |
| -6.7                    | -4.7                       | 2.0              | 0.0214        | 0.33               | Shank3    |
| -4.6                    | -2.6                       | 1.9              | 0.0385        | 0.02               | Crk       |
| -4.5                    | -7.1                       | -2.6             | 0.0001        | 0.21               | Ablim3    |
| -4.1                    | -2.8                       | 1.3              | 0.0013        | 0.66               | Grin2b    |
| -4.1                    | -3.0                       | 1.1              | 0.0261        | 0.93               | Grin2a    |
| -4.1                    | -2.2                       | 1.9              | 0.0431        | 0.11               | Crkl      |
| -3.7                    | -2.6                       | 1.1              | 0.0144        | 0.90               | Clcn2     |
| -3.7                    | -2.6                       | 1.1              | 0.0109        | 0.76               | Ywhag     |
| -3.7                    | -2.1                       | 1.6              | 0.0448        | 0.63               | Ablim3    |
| -3.6                    | -2.4                       | 1.3              | 0.0459        | 0.54               | Anxa7     |
| -3.6                    | -2.1                       | 1.4              | 0.0490        | 0.10               | Mapk11    |
| -3.5                    | -2.4                       | 1.1              | 0.0205        | 0.94               | Shisa6    |
| -3.5                    | -2.5                       | 1.0              | 0.0022        | 0.95               | Kcnab2    |
| -3.4                    | -2.3                       | 1.1              | 0.0390        | 0.96               | Arap2     |
| -3.3                    | -5.1                       | -1.8             | 0.0025        | 0.29               | Shank1    |
| -3.3                    | -2.0                       | 1.4              | 0.0297        | 0.45               | Ntm       |
| -3.3                    | -2.2                       | 1.0              | 0.0287        | 0.93               | Cacng2    |
| -2.8                    | -4.3                       | -1.5             | 0.0225        | 0.41               | Grid2ip   |
| -2.1                    | -3.3                       | -1.2             | 0.0309        | 0.67               | Slc25a4   |
| -1.7                    | -3.0                       | -1.2             | 0.0071        | 0.70               | Axl       |
| -1.7                    | -2.7                       | -1.1             | 0.0096        | 0.14               | Arhgap32  |
| -1.6                    | -3.2                       | -1.6             | 0.0433        | 0.12               | Sirpa     |

235 Table 4: Genes containing phosphotyrosine phosphopeptides whose abundance change in 12 month  
 236 old knockouts displays  $p < 0.05$  and which display the greatest reductions in fold change compared to  
 237 comparisons between 2 month old knockouts vs wildtype mice.  $n = 3 - 4$ /genotype. Some

238 phosphopeptides could come from products of several genes, as listed. These genes represent  
 239 candidates for interactions between effects of PTPRD expression and aging.  
 240 This group of genes provided  $p < 10^{-7}$  FDR-corrected significance for over-representation in GO  
 241 categories: including neurotransmitter receptor complex, inotropic glutamate receptor complex,  
 242 synapse, ion channel complex, transporter complex, postsynapse, postsynaptic density, asymmetric  
 243 synapse, postsynaptic specialization, postsynaptic membrane and cell junction (Supplementary Table  
 244 6). These localizations fit a hypothesis that aging reduces the magnitudes of a number of the synaptic  
 245 adaptations to loss of PTPRD.

246 *Phosphotyrosine phosphopeptides with larger KO:WT differences in older vs younger mice:* We also  
 247 identified 33 phosphopeptides from products of 24 genes whose abundance differences between  
 248 knockout and wildtype mice were  $> 1.5$ -fold larger with  $p < 0.05$  in comparisons of old knockout vs old  
 249 wildtype mice (Table 5, Supplementary Table 7).

| Difference<br>old-young | Fold change                |                  |                  |                    | Gene Name(s) |
|-------------------------|----------------------------|------------------|------------------|--------------------|--------------|
|                         | Fold change old<br>KO : WT | Young KO :<br>WT | p old KO :<br>WT | p young KO<br>: WT |              |
| 37.8                    | 26.9                       | -10.9            | 0.00             | 0.29               | Dbi          |
| 33.3                    | -2.9                       | -36.2            | 0.03             | 0.20               | Shisa6       |
| 10.1                    | 8.7                        | -1.5             | 0.03             | 0.65               | Camkv        |
| 6.4                     | 3.3                        | -3.0             | 0.02             | 0.04               | Ptk2         |
| 6.1                     | 2.8                        | -3.3             | 0.04             | 0.00               | Grin2a       |
| 4.3                     | 3.0                        | -1.3             | 0.02             | 0.57               | Mapk1;Mapk3  |
| 4.2                     | 2.1                        | -2.1             | 0.02             | 0.03               | Akr1b1       |
| 4.2                     | 2.7                        | -1.5             | 0.01             | 0.16               | Ptpn11       |
| 4.1                     | 2.5                        | -1.6             | 0.02             | 0.31               | Syngap1      |
| 3.9                     | 2.4                        | -1.5             | 0.03             | 0.47               | Esyt1        |
| 3.9                     | 1.8                        | -2.0             | 0.02             | 0.02               | Glud1        |
| 3.7                     | 2.2                        | -1.5             | 0.02             | 0.24               | Shc3         |
| 3.7                     | 2.2                        | -1.5             | 0.04             | 0.24               | Pcnx1        |
| 3.6                     | 2.3                        | -1.3             | 0.04             | 0.09               | Iqsec2       |
| 3.6                     | 2.1                        | -1.4             | 0.02             | 0.43               | Dlg4         |
| 3.4                     | 2.3                        | -1.1             | 0.03             | 0.78               | Dlg2         |
| 3.4                     | 2.3                        | -1.2             | 0.03             | 0.27               | Grin2b       |
| 3.3                     | 2.2                        | -1.2             | 0.04             | 0.53               | Lasp1;Neb1   |
| 3.3                     | 2.1                        | -1.1             | 0.02             | 0.65               | Bcr          |

|     |       |       |      |      |          |
|-----|-------|-------|------|------|----------|
| 2.8 | 4.1   | 1.3   | 0.04 | 0.61 | Copa     |
| 2.8 | -16.7 | -19.5 | 0.01 | 0.00 | Il1rapl1 |
| 2.3 | -2.1  | -4.4  | 0.02 | 0.26 | Ajm1     |
| 1.9 | 3.0   | 1.1   | 0.01 | 0.96 | Pkm      |
| 1.5 | 2.6   | 1.1   | 0.02 | 0.98 | Actr3    |

250 Table 5: Genes containing phosphotyrosine phosphopeptides whose abundance change in 12 month  
251 old knockouts displays  $p < 0.05$  and which display the greatest fold change compared to comparisons  
252 between 2 month old knockouts vs wildtype mice.  $n = 3 - 4$ /genotype. Some phosphopeptides could  
253 come from products of several genes, as listed. These genes represent candidates for interactions  
254 between effects of PTPRD expression and aging.

255 Overrepresented  $p < 10^{-6}$  GO terms supported aging influences on synaptic adaptations to loss of  
256 PTPRD including: glutamatergic synapse, cell junction, postsynaptic density membrane, synapse,  
257 postsynaptic specialization membrane, asymmetric synapse, postsynaptic density, neuron to neuron  
258 synapse, postsynaptic membrane, ionotropic glutamate receptor complex, intrinsic component of  
259 postsynaptic density membrane and neurotransmitter receptor complex (Supplementary Table 8).  
260 These localizations again fit with aging influences on the synaptic adaptations to loss of PTPRD.

261 *Replications in an independent dataset:* We identified nominally-significant  $> 1.5$  fold/  $p < 0.05$   
262 changes in several of the top genes from our primary dataset in brains of independent groups of mice  
263 with a different brain freezing approach. Irs2, Kcnab2 and Pdha1 provided smaller magnitude, but  $p <$   
264  $0.05$  increased phosphopeptide abundance in this independent dataset. There was a trend ( $p = 0.08$ ,  
265 hypergeometric test) toward significant overlap with the set of genes with more abundant  
266 phosphopeptide abundance in the data presented in Table I.

267 There was decreased expression ( $> 1.5$ -fold,  $p < 0.05$ ) of Il1rapl1, Slitrk5 and Dlgap1 in young  
268 homozygous knockouts in this dataset. The three overlapping genes whose phosphopeptide  
269 abundance decreased in young knockouts (Table 2) provided  $p = 10^{-5}$  (hypergeometric testing). Dlg2  
270 and Grin2a were also decreased  $> 1.5$  fold though with  $p > 0.05$ .

271 *Gene dose relationships in our independent dataset:* Data comparing changes in homozygous vs  
272 heterozygous knockouts (vs wildtype mice) provide information about gene dose-response  
273 relationships for phosphopeptides from gene products that are most increased or decreased in  
274 abundance in knockouts. Phosphopeptides that displayed increased abundance in knockouts vs  
275 wildtype mice displayed typical gene dose-response patterns: heterozygotes displayed smaller  
276 differences from wildtype and less statistical significance than homozygotes for phosphopeptide  
277 products of each of the genes that displayed nominally-significant upregulation > 1.5-fold in our  
278 replication dataset.

279 Gene dose-response relationships for decreases were not as simple. Decreases in both IL1RAPL1  
280 and SLITRK5 phosphopeptide abundance vs wildtype mice were smaller and did not reach nominal  
281 significance in heterozygotes, although the much larger declines found in homozygous knockouts  
282 reached high levels of significance, as noted above. By contrast, the declines in Dlg2, Dlgap1 and  
283 Grin2a phosphopeptide abundance were larger and reached higher levels of statistical significance  
284 for differences from wildtype in heterozygotes vs homozygotes.

## 285 **Discussion**

286 The current results document differences in brain tyrosine phosphorylation that define groups of  
287 candidate PTPRD substrates, sets of candidate adaptations to loss of PTPRD activity and groups of  
288 potential aging effects on these candidate substrates and adaptations. We discuss the strengths and  
289 limitations of these results and the ways in which they point toward important roles for PTPRD  
290 activity. We note pathways whereby these changes could contribute to human and mouse model  
291 associations between PTPRD variation and addictions, RLS and Alzheimer's disease  
292 pathophysiologies. We map the place that these brain phosphotyrosine phosphoproteomic results  
293 assume in the study of complex phosphorylation and dephosphorylation events in the brain.

294 The genes (or groups of genes) corresponding to phosphopeptides that display both  $\geq 1.5$ -fold  
295 increased abundance and nominal  $p < 0.05$  in young PTPRD knockout vs wildtype mice form an



296 interesting group. This group of genes contains many more whose products are expressed in  
297 presynaptic localizations (where much of PTPRD is expressed (14)) than expected by chance. Allen  
298 brain institute data supports colocalization of moderate to relatively high levels of expression of 45%  
299 of these genes in many of the neuronal subtypes that also express PTPRD (Table 1). Although it is  
300 possible that some of these increases in tyrosine phosphopeptide abundance come from adaptations  
301 to loss of PTPRD, this group of genes, overall, is likely to provide many candidate PTPRD substrates.  
302 There is significant, but imperfect overlap with other relevant datasets. There is significant overlap (11  
303 genes, hypergeometric  $p = 10^{-9}$ ) between the gene products identified in our studies and the 59  
304 genes/groups of genes whose tyrosine phosphorylation was reported increased by  $> 1.5$  fold ( $p <$   
305  $0.05$ ) in studies of a different strain of PTPRD knockout mice that were reported while our work was in  
306 progress (14). There is also overlap with genes identified with increased tyrosine phosphorylation in  
307 *C. elegans* with deletion of the *ptp-3* gene that corresponds to PTPRD, PTPRS and PTPRF (6 genes,  
308 hypergeometric  $p = 9 \times 10^{-5}$ ) (13).

309 In other work we have identified 1.3-fold increases of abundance of a phosphotyrosine  
310 phosphopeptide with sequence shared between GSK3 $\beta$  and GSK3 $\alpha$  in Western analyses of proteins  
311 from PTPRD knockout mice. This was one of the phosphopeptides increased in *C. elegans* *ptp-3*  
312 knockouts (13). The more modest magnitude of our Western results could explain why it was not  
313 detected in our phosphoproteomic datasets with  $> 1.5$ -fold thresholds.

314 Actin, cofilin and dock 4 phosphopeptides identified as candidate substrates for PTPRD's  
315 phosphatase in the phosphoproteomics datasets developed herein are each actual substrates for  
316 recombinant PTPRD phosphatase *in vitro*. Rates for orthophosphate release from these  
317 phosphopeptides range from brisk to very brisk, with release from the actin $\beta$ \_3 peptide almost 50%  
318 greater and that from the dock4 phosphopeptide almost double the brisk rate of release from the  
319 active positive control END(pY)INASL. Each of the tested candidate substrates is thus actually

320 hydrolyzed by recombinant PTPRD phosphatase *in vitro*, adding substantially to our overall  
321 confidence in the phosphoproteomic datasets.

322 There is also significant overall support for the set of phosphotyrosine phosphoproteins that display  
323 less abundance in 2 month old mice with reduced PTPRD expression. Allen brain institute data  
324 supports colocalization of moderate to relatively high levels of expression of 47% of these genes in  
325 many of the neuronal subtypes that also express PTPRD. There is significant overlap (8 genes,  
326 hypergeometric  $p < 10^{-9}$ ) between the gene products identified in our studies and the 43  
327 genes/groups of genes whose tyrosine phosphorylation was reported decreased by  $> 1.5$  fold ( $p <$   
328  $0.05$ ) in studies of a different strain of PTPRD knockout mice reported while our work was in progress  
329 (14). There is thus significant support for the validity of our set of downregulated genes as well as the  
330 GO links to postsynaptic locations that fit with adaptive roles for these reductions in phosphotyrosine  
331 phosphoprotein abundance. While several of these phosphopeptides have functional annotations in  
332 one of the best phosphopeptide annotation databases, future studies will be required to identify roles  
333 for most of these phosphotyrosines in regulating function. Roles in regulating the activities of products  
334 of the IL1RAPL1 and SLITRK 4 and 5 genes seem especially merited due to their roles as likely  
335 PTPRD ligands. In future work, we will assess possible contributions of changes in overall IL1RAPL1,  
336 SLITRK4 and SLITRK5 gene expression to these changes in abundance of the corresponding  
337 phosphotyrosine phosphopeptides.

338 There is evidence for both attenuation and increases in the changes in noted in young mice when 12  
339 month-old knockout data is compared to data from wildtype littermate mice aged in parallel in the  
340 same facility. The genes whose products display less phosphotyrosine phosphoprotein abundance  
341 and those whose products display more phosphotyrosine phosphoprotein abundance in the older  
342 mice each provide candidates for interactions between age and level of PTPRD expression. From this  
343 group, we thus have candidates to participate in aging interactions with levels of PTPRD expression.  
344 Aging x level of expression changes are, in turn, candidates to contribute to the accumulation of

345 phosphotau immunoreactivity that we have observed in aged mice with reduced PTPRD expression.

346 This group also provides candidates to participate in the interactions between aging and altered  
347 PTPRD expression that are implied by the human associations between Alzheimer's disease  
348 neurofibrillary pathology and intron 10 PTPRD genomic markers that are near those that we have  
349 associated with levels of PTPRD expression (4, 5).

350 There are limitations of these data. Similar sequences surrounding phosphotyrosines provide  
351 ambiguity concerning which exact actin, tubulin, MAP kinase, CAM kinase, disc-large or other gene  
352 products actually display increased abundance in mice with reduced PTPRD expression. Our results  
353 do not separate differences in levels of expression of genes whose phosphotyrosine phosphopeptide  
354 abundance that we monitor here from differences in the extent of tyrosine phosphorylation of these  
355 proteins. The wealth of information about the existence of tyrosine phosphorylation sites and their  
356 phosphorylation patterns has grown much faster than our understanding of the physiological or  
357 regulatory roles that many of these tyrosine phosphorylations provide. The apparent lower sensitivity  
358 of our datasets using a different freezing method, and thus the lower overlap of these independent  
359 results with our primary dataset, underscores the exquisite sensitivity of these phosphoproteomic  
360 analyses to the speed of tissue freezing.

361 Phosphotyrosine phosphoproteomic methods have been used to aid identification of tyrosine  
362 phosphorylated phosphoproteins whose abundance is changed in cells or tissues with changes in  
363 activity of other tyrosine phosphatases including products of the PTPRB (29), PTPRG (30), PTPN11  
364 (31, 32) and PTP4A3 (33) genes. However, the relatively novelty of this area is highlighted in a recent  
365 review (34) that observes that only 3% of the phosphorylation sites annotated even in one of the  
366 most-updated databases (PhosphoSitePlus (35)) have a corresponding experimentally-validated  
367 human kinase. Our work thus adds to a modest but growing number of approaches to identification of  
368 protein tyrosine phosphatase substrates and adaptive changes to altered tyrosine phosphatase  
369 activities using this approach.

Human association datasets and mouse model results have motivated us to identify the first PTPRD phosphatase inhibitor lead compound, 7-BIA(10), and to find that quercetin and related flavanols provide the first PTPRD positive allosteric modulators/lead compounds (36). Transient pharmacological PTPRD phosphatase inhibition with 7-BIA leads to increases in brain pYGSK3 $\beta$  and pYGSK3 $\alpha$  immunoreactivity that are about 2/3 the magnitude of changes induced by chronic genetic reductions in PTPRD expression in heterozygous knockout mice (37). The current phosphoproteomic datasets from knockout mice can thus provide a template for studies seeking effects of transient pharmacological modulation of brain PTPRD activities in ways that could improve understanding of PTPRD-associated pathophysiological disease processes in addiction, RLS and neurofibrillary pathologies, This type of work can aid more precise targeting of improved therapeutics to these pathophysiological mechanisms.

**Acknowledgements** PTPRD knockout mice were generously provided by N Uetani and Y Iwakura. A Nelson and K Abell performed phosphoproteomics sample preparation. We received valuable advice and assistance from W Wang, T Priszano, F I Carroll, A Sulima, K Rice, J Adair and O Kovbasnjuk. We are grateful to support from NIDA and NIA U01DA047713 and supplement, (J Acri and R Klein, program officers) and the Biomedical Research Institute of New Mexico GRU and IH are coinventors of a patent submitted by the VA Office of Technology Transfer “Compounds for treating tauopathies and Restless Leg Syndrome and methods of using and screening for the same” that covers work with PTPRD positive allosteric modulators . GRU serves without compensation on the Medical and Scientific Advisory board of the Restless Leg Syndrome Foundation. MPS is an employee of Cell Signaling Technology, Inc, Danvers, Massachusetts which offers commercial phosphoproteomics services.

## References

- 394 1. Uhl GR, Martinez MJ. PTPRD: neurobiology, genetics, and initial pharmacology of a pleiotropic contributor to  
395 brain phenotypes. *Ann N Y Acad Sci.* 2019;1451(1):112-29.
- 396 2. Shishikura M, Nakamura F, Yamashita N, Uetani N, Iwakura Y, Goshima Y. Expression of receptor protein tyrosine  
397 phosphatase delta, PTPdelta, in mouse central nervous system. *Brain Res.* 2016;1642:244-54.
- 398 3. Fukai S, Yoshida T. Roles of type IIa receptor protein tyrosine phosphatases as synaptic organizers. *FEBS J.* 2020.
- 399 4. Chibnik LB, White CC, Mukherjee S, Raj T, Yu L, Larson EB, et al. Susceptibility to neurofibrillary tangles: role of  
400 the PTPRD locus and limited pleiotropy with other neuropathologies. *Mol Psychiatry.* 2018;23(6):1521-9.
- 401 5. Drgonova J, Walther D, Wang KJ, Hartstein GL, Lochte B, Troncoso J, et al. Mouse model for PTPRD associations  
402 with WED/RLS and addiction: reduced expression alters locomotion, sleep behaviors and cocaine-conditioned place  
403 preference. *Mol Med.* 2015.
- 404 6. Schormair B, Zhao C, Bell S, Tilch E, Salminen AV, Putz B, et al. Identification of novel risk loci for restless legs  
405 syndrome in genome-wide association studies in individuals of European ancestry: a meta-analysis. *Lancet Neurol.*  
406 2017;16(11):898-907.
- 407 7. Hart AB, Engelhardt BE, Wardle MC, Sokoloff G, Stephens M, de Wit H, et al. Genome-wide association study of  
408 d-amphetamine response in healthy volunteers identifies putative associations, including cadherin 13 (CDH13). *PLoS*  
409 *One.* 2012;7(8):e42646.
- 410 8. Cox JW, Sherva RM, Lunetta KL, Johnson EC, Martin NG, Degenhardt L, et al. Genome-Wide Association Study of  
411 Opioid Cessation. *J Clin Med.* 2020;9(1).
- 412 9. Choucair N, Mignon-Ravix C, Cacciagli P, Abou Ghoch J, Fawaz A, Megarbane A, et al. Evidence that homozygous  
413 PTPRD gene microdeletion causes trigonocephaly, hearing loss, and intellectual disability. *Mol Cytogenet.* 2015;8:39.
- 414 10. Uhl GR, Martinez MJ, Paik P, Sulima A, Bi GH, Iyer MR, et al. Cocaine reward is reduced by decreased expression  
415 of receptor-type protein tyrosine phosphatase D (PTPRD) and by a novel PTPRD antagonist. *Proc Natl Acad Sci U S A.*  
416 2018;115(45):11597-602.
- 417 11. Uetani N, Kato K, Ogura H, Mizuno K, Kawano K, Mikoshiba K, et al. Impaired learning with enhanced  
418 hippocampal long-term potentiation in PTPdelta-deficient mice. *EMBO J.* 2000;19(12):2775-85.
- 419 12. Uhl, Dolkadny, Martinez et al, submitted
- 420 13. Mitchell CJ, Kim MS, Zhong J, Nirujogi RS, Bose AK, Pandey A. Unbiased identification of substrates of protein  
421 tyrosine phosphatase ptp-3 in *C. elegans*. *Mol Oncol.* 2016;10(6):910-20.
- 422 14. Park H, Choi Y, Jung H, Kim S, Lee S, Han H, et al. Splice-dependent trans-synaptic PTPdelta-IL1RAPL1 interaction  
423 regulates synapse formation and non-REM sleep. *EMBO J.* 2020;39(11):e104150.
- 424 15. Stokes MP, Farnsworth CL, Gu H, Jia X, Worsfold CR, Yang V, et al. Complementary PTM Profiling of Drug  
425 Response in Human Gastric Carcinoma by Immunoaffinity and IMAC Methods with Total Proteome Analysis. *Proteomes.*  
426 2015;3(3):160-83.
- 427 16. Rappsilber J, Ishihama Y, Mann M. Stop and go extraction tips for matrix-assisted laser desorption/ionization,  
428 nanoelectrospray, and LC/MS sample pretreatment in proteomics. *Anal Chem.* 2003;75(3):663-70.
- 429 17. Olsen JV, de Godoy LM, Li G, Macek B, Mortensen P, Pesch R, et al. Parts per million mass accuracy on an  
430 Orbitrap mass spectrometer via lock mass injection into a C-trap. *Mol Cell Proteomics.* 2005;4(12):2010-21.
- 431 18. Villen J, Beausoleil SA, Gerber SA, Gygi SP. Large-scale phosphorylation analysis of mouse liver. *Proc Natl Acad*  
432 *Sci U S A.* 2007;104(5):1488-93.
- 433 19. Eng JK, Jahan TA, Hoopmann MR. Comet: an open-source MS/MS sequence database search tool. *Proteomics.*  
434 2013;13(1):22-4.
- 435 20. MacLean B, Tomazela DM, Shulman N, Chambers M, Finney GL, Frewen B, et al. Skyline: an open source  
436 document editor for creating and analyzing targeted proteomics experiments. *Bioinformatics.* 2010;26(7):966-8.
- 437 21. Sequences available from the authors on request
- 438 22. Biomatic, sequencs available from the authors on request
- 439 23. Yoshida T, Yasumura M, Uemura T, Lee SJ, Ra M, Taguchi R, et al. IL-1 receptor accessory protein-like 1  
440 associated with mental retardation and autism mediates synapse formation by trans-synaptic interaction with protein  
441 tyrosine phosphatase delta. *J Neurosci.* 2011;31(38):13485-99.
- 442 24. Takahashi H, Katayama K, Sohya K, Miyamoto H, Prasad T, Matsumoto Y, et al. Selective control of inhibitory  
443 synapse development by Slitrk3-PTPdelta trans-synaptic interaction. *Nat Neurosci.* 2012;15(3):389-98, S1-2.

- 444 25. Xiao Y, Peng Y, Wan J, Tang G, Chen Y, Tang J, et al. The atypical guanine nucleotide exchange factor Dock4  
445 regulates neurite differentiation through modulation of Rac1 GTPase and actin dynamics. *J Biol Chem.*  
446 2013;288(27):20034-45.
- 447 26. Piriya Ananda Babu L, Wang HY, Eguchi K, Guillaud L, Takahashi T. Microtubule and Actin Differentially Regulate  
448 Synaptic Vesicle Cycling to Maintain High-Frequency Neurotransmission. *J Neurosci.* 2020;40(1):131-42.
- 449 27. Pinho J, Marcut C, Fonseca R. Actin remodeling, the synaptic tag and the maintenance of synaptic plasticity.  
450 *IUBMB Life.* 2020;72(4):577-89.
- 451 28. Rust MB. ADF/cofilin: a crucial regulator of synapse physiology and behavior. *Cell Mol Life Sci.* 2015;72(18):3521-  
452 9.
- 453 29. Drexler HCA, Vockel M, Polaschegg C, Frye M, Peters K, Vestweber D. Vascular Endothelial Receptor Tyrosine  
454 Phosphatase: Identification of Novel Substrates Related to Junctions and a Ternary Complex with EPHB4 and TIE2. *Mol*  
455 *Cell Proteomics.* 2019;18(10):2058-77.
- 456 30. Miranda M, Toffali L, Montresor A, Scardoni G, Sorio C, Laudanna C. Protein tyrosine phosphatase receptor type  
457 gamma is a JAK phosphatase and negatively regulates leukocyte integrin activation. *J Immunol.* 2015;194(5):2168-79.
- 458 31. Batth TS, Papetti M, Pfeiffer A, Tollenaere MAX, Francavilla C, Olsen JV. Large-Scale Phosphoproteomics Reveals  
459 Shp-2 Phosphatase-Dependent Regulators of Pdgf Receptor Signaling. *Cell Rep.* 2018;22(10):2784-96.
- 460 32. Corallino S, Iwai LK, Payne LS, Huang PH, Sacco F, Cesareni G, et al. Alterations in the phosphoproteomic profile  
461 of cells expressing a non-functional form of the SHP2 phosphatase. *N Biotechnol.* 2016;33(5 Pt A):524-36.
- 462 33. Walls CD, Iliuk A, Bai Y, Wang M, Tao WA, Zhang ZY. Phosphatase of regenerating liver 3 (PRL3) provokes a  
463 tyrosine phosphoproteome to drive prometastatic signal transduction. *Mol Cell Proteomics.* 2013;12(12):3759-77.
- 464 34. Savage SR, Zhang B. Using phosphoproteomics data to understand cellular signaling: a comprehensive guide to  
465 bioinformatics resources. *Clin Proteomics.* 2020;17:27.
- 466 35. Hornbeck PV, Kornhauser JM, Latham V, Murray B, Nandhikonda V, Nord A, et al. 15 years of  
467 PhosphoSitePlus(R): integrating post-translationally modified sites, disease variants and isoforms. *Nucleic Acids Res.*  
468 2019;47(D1):D433-D41.
- 469 36. Henderson, Uhl and others, submitted for publication
- 470 37. Uhl, Dolkadny, MARTinez and others, in preparation
- 471

## 472 **Supplementary Table Legends**

473 Supplementary Table 1: Phosphotyrosine phosphopeptides and related genes whose abundance is  
474 increased > 1.5 fold with  $p < 0.05$  in proteins extracted from brains of 2 month old PTPRD knockout  
475 mice compared to wildtype littermates.  $n = 4/\text{genotype}$ . Some phosphopeptides could come from  
476 several genes, as listed.

477 Supplementary Table 2: Gene ontology (cellular component) terms overrepresented ( $p < 10^{-4}$ ) in the  
478 list of genes in Table 1.

479 Supplementary Table 3: Phosphotyrosine phosphopeptides and related genes whose abundance is  
480 decreased > 1.5 fold with  $p < 0.05$  in proteins extracted from brains of 2 month old PTPRD knockout

481 mice compared to wildtype littermates. n = 4/genotype. Some phosphopeptides could come from  
482 several genes, as listed.

483 Supplementary Table 4: Gene ontology (cellular component) terms overrepresented ( $p < 10^{-4}$ ) in the  
484 list of genes in Table 2.

485 Supplementary Table 5: Phosphotyrosine phosphopeptides and related genes whose abundance is  
486 decreased  $> 1.5$  fold more in old knockout vs wildtpe comparisons than in young knockout vs wildtype  
487 comparisons (and which display  $p < 0.05$  in old knockout/wildtype comparisons. n = 3 - 4/  
488 genotype/age group. Some phosphopeptides could come from several genes, as listed.

489 Supplementary Table 6: Gene ontology (cellular component) terms overrepresented ( $p < 10^{-5}$ ) in the  
490 list of genes in Table 4.

491 Supplementary Table 7: Phosphotyrosine phosphopeptides and related genes whose abundance is  
492 increased  $> 1.5$  fold more in old knockout vs wildtpe comparisons than in young knockout vs wildtype  
493 comparisons (and which display  $p < 0.05$  in old knockout/wildtype comparisons. n = 3 - 4/  
494 genotype/age group. Some phosphopeptides could come from several genes, as listed.

495 Supplementary Table 6: Gene ontology (cellular component) terms overrepresented ( $p < 2 \times 10^{-6}$ ) in  
496 the list of genes in Table 5.
